# Supplementary material for: CD71+ Erythroid Cells in Human Neonates Exhibit Immunosuppressive Properties and Compromise Immune Response Against Systemic Infection in Neonatal Mice
Source: PubMed Central journal article supplement (PMC7732591; doi:10.3389/fimmu.2020.597433), 2020-11-24
Supplement: DataSheet_1.pdf [file DataSheet_1.pdf]

**Supplementary Figure 1**

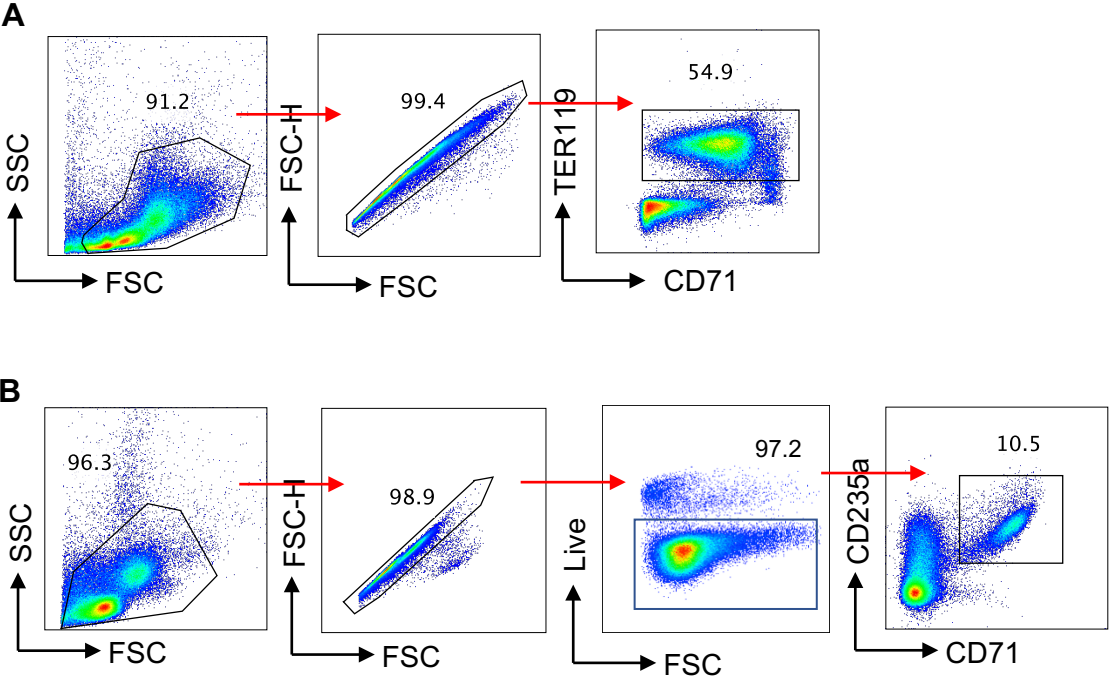

**A)** Representative flow cytometry plots showing the gating strategy for CD71+TER119+ erythroid cells in neonatal mice.

**B)** Representative flow cytometry plots showing the gating strategy for CD71+CD235a+ erythroid cells in human newborns.

# Supplementary Figure 2

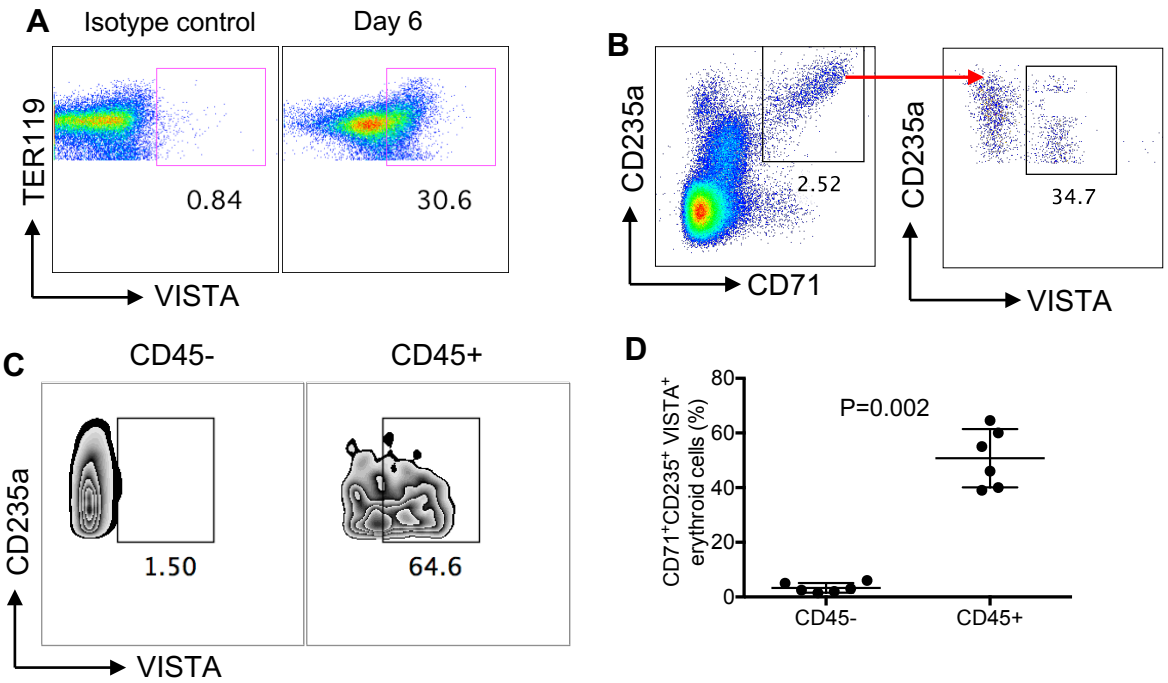

**A)** Representative plot showing expression of VISTA on mice CECs. **B)** Representative plots showing expression of VISTA on total CECs in a human newborn. **C)** Representative plots showing expression of VISTA on CD45<sup>-</sup> versus CD45<sup>+</sup> CECs in a human infant. **D)** Cumulative data showing percentages of VISTA expressing CECs among CD45<sup>-</sup> versus CD45<sup>+</sup> subpopulations in human infants.

### Supplementary Figure 3

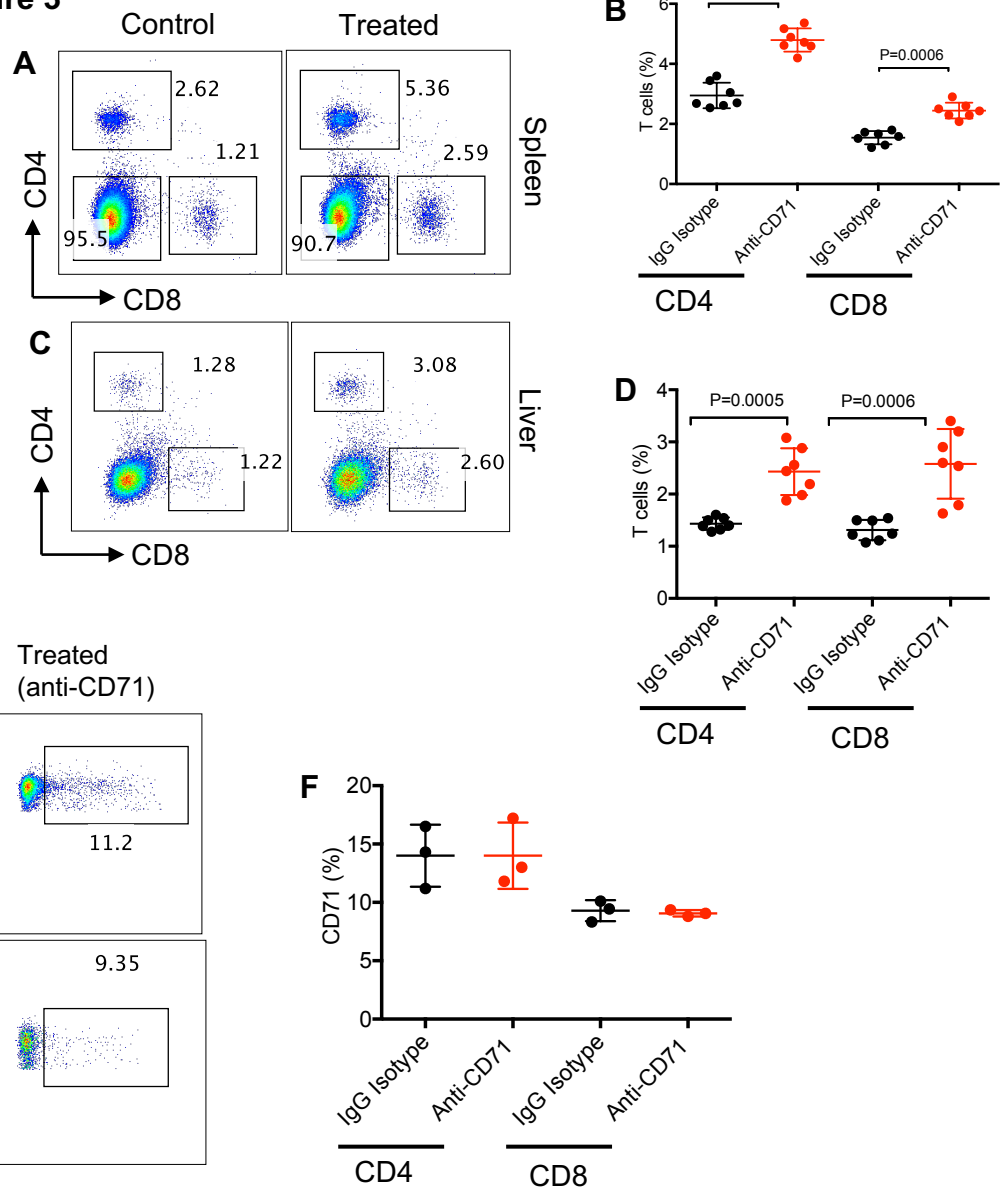

**A)** Representative flow cytometry plots, and **(B)** quantification of CD4<sup>+</sup> and CD8<sup>+</sup> T cells in the spleen of anti-CD71 treated versus controls. **(C)** Representative flow cytometry plots, and **(D)** quantification of CD4<sup>+</sup> and CD8<sup>+</sup> T cells in the liver of anti-CD71 treated versus controls. Differences in mean values analyzed by 2-tailed student's t test; p value is shown; N=7/group, from at least 2 experiments. **(E)** Representative flow cytometry plots, and **(F)** cumulative data of CD71 expression on CD4<sup>+</sup> or CD8<sup>+</sup> T cells in IgG Isotype control treated versus anti-CD71 treated 6 days old neonatal mice. A representative experiment from two.
